# Supplementary material for: Multifocal Osteoarticular Infections in Infants: A Case Report with Long-Term Follow-Up
Source: Research Square preprint supplement (doi:10.21203/rs.3.rs-6380645/v1), 2025-05-09
Supplement: Supplementary file 1 [file 01137d95ec05c1eba3335e55.pdf]

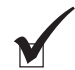

| Topic                               | Item       | Checklist item description                                                                                   | Reported on Line                                                    |
|-------------------------------------|------------|--------------------------------------------------------------------------------------------------------------|---------------------------------------------------------------------|
| <b>Title</b>                        | <b>1</b>   | The diagnosis or intervention of primary focus followed by the words “case report” .....                     | line2                                                               |
| <b>Key Words</b>                    | <b>2</b>   | 2 to 5 key words that identify diagnoses or interventions in this case report, including "case report" ...   | line25-26                                                           |
| <b>Abstract<br/>(no references)</b> | <b>3a</b>  | Introduction: What is unique about this case and what does it add to the scientific literature? .....        | line43-46                                                           |
|                                     | <b>3b</b>  | Main symptoms and/or important clinical findings .....                                                       | line48-50                                                           |
|                                     | <b>3c</b>  | The main diagnoses, therapeutic interventions, and outcomes .....                                            | line56-79                                                           |
|                                     | <b>3d</b>  | Conclusion—What is the main “take-away” lesson(s) from this case? .....                                      | line127-129                                                         |
| <b>Introduction</b>                 | <b>4</b>   | One or two paragraphs summarizing why this case is unique ( <b>may include references</b> ) .....            | line43-46                                                           |
| <b>Patient Information</b>          | <b>5a</b>  | De-identified patient specific information. ....                                                             | figure2                                                             |
|                                     | <b>5b</b>  | Primary concerns and symptoms of the patient. ....                                                           | line48-50                                                           |
|                                     | <b>5c</b>  | Medical, family, and psycho-social history including relevant genetic information .....                      | not applicable                                                      |
|                                     | <b>5d</b>  | Relevant past interventions with outcomes .....                                                              | not applicable                                                      |
| <b>Clinical Findings</b>            | <b>6</b>   | Describe significant physical examination (PE) and important clinical findings. ....                         | line48-56                                                           |
| <b>Timeline</b>                     | <b>7</b>   | Historical and current information from this episode of care organized as a timeline .....                   | line58-79                                                           |
| <b>Diagnostic<br/>Assessment</b>    | <b>8a</b>  | Diagnostic testing (such as PE, laboratory testing, imaging, surveys). ....                                  | line50-77                                                           |
|                                     | <b>8b</b>  | Diagnostic challenges (such as access to testing, financial, or cultural) .....                              | line28-29                                                           |
|                                     | <b>8c</b>  | Diagnosis (including other diagnoses considered) .....                                                       | line55; line73                                                      |
|                                     | <b>8d</b>  | Prognosis (such as staging in oncology) where applicable .....                                               | line76-79                                                           |
| <b>Therapeutic<br/>Intervention</b> | <b>9a</b>  | Types of therapeutic intervention (such as pharmacologic, surgical, preventive, self-care) .....             | line58-67                                                           |
|                                     | <b>9b</b>  | Administration of therapeutic intervention (such as dosage, strength, duration) .....                        | line63-67                                                           |
|                                     | <b>9c</b>  | Changes in therapeutic intervention (with rationale) .....                                                   | not applicable                                                      |
| <b>Follow-up and<br/>Outcomes</b>   | <b>10a</b> | Clinician and patient-assessed outcomes (if available) .....                                                 | line44-46                                                           |
|                                     | <b>10b</b> | Important follow-up diagnostic and other test results .....                                                  | line68-79                                                           |
|                                     | <b>10c</b> | Intervention adherence and tolerability (How was this assessed?) .....                                       | not applicable                                                      |
|                                     | <b>10d</b> | Adverse and unanticipated events .....                                                                       | line54                                                              |
| <b>Discussion</b>                   | <b>11a</b> | A scientific discussion of the strengths AND limitations associated with this case report .....              | not applicable                                                      |
|                                     | <b>11b</b> | Discussion of the relevant medical literature <b>with references</b> . ....                                  | line81-125                                                          |
|                                     | <b>11c</b> | The scientific rationale for any conclusions (including assessment of possible causes) .....                 | line81-125                                                          |
|                                     | <b>11d</b> | The primary “take-away” lessons of this case report (without references) in a one paragraph conclusion ..... | line127-129                                                         |
| <b>Patient Perspective</b>          | <b>12</b>  | The patient should share their perspective in one to two paragraphs on the treatment(s) they received .....  | not applicable                                                      |
| <b>Informed Consent</b>             | <b>13</b>  | Did the patient give informed consent? Please provide if requested .....                                     | Yes <input checked="" type="checkbox"/> No <input type="checkbox"/> |
